# Supplementary material for: Actin remodeling driven by circLIMA1: sperm cell as an intriguing cellular model
Source: PubMed Central journal article supplement (PMC9379403; doi:10.7150/ijbs.76261), 2022-08-08
Supplement: ijbsv18p5136s1.pdf [file ijbsv18p5136s1.pdf]

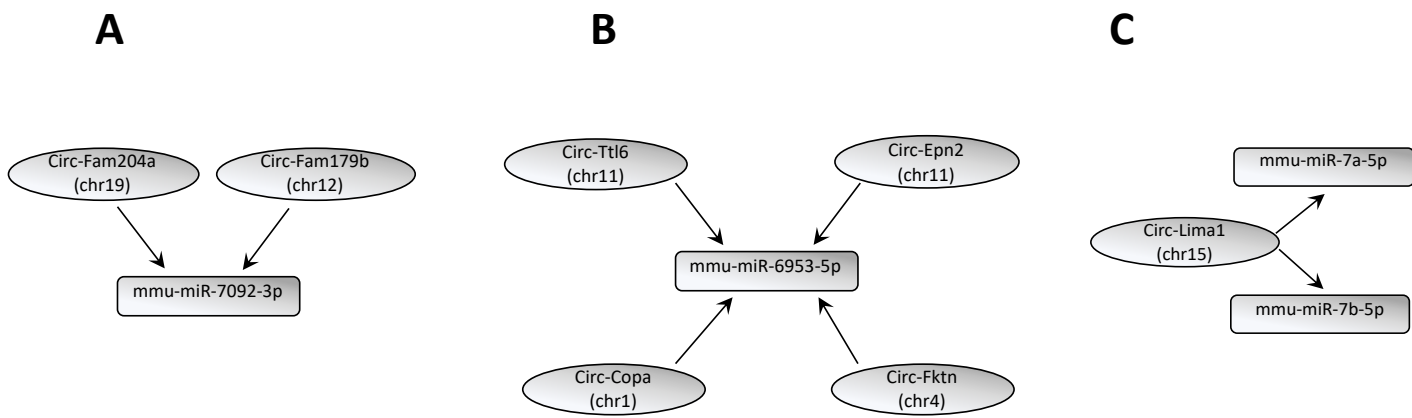

**Supplementary Figure S1**

**Figure S1. Functional clustering of DE-circRNAs in  $CB1^{-/-}$  compared to WT SPZ. (A)** Two circRNAs whose host genes are members of the same gene family but located on different chromosomes show tethering activity toward the same miRNA as target. **(B)** Four circRNAs whose host genes are located on different chromosomes, tether the same miRNA. **(C)** The same circRNA shows tethering activity toward a family of miRNA isoforms. Networks were built using Cytoscape. Ovoid and rectangular symbols represent circRNAs and miRNAs, respectively. The arrow indicates the tethering activity of circRNAs toward miRNAs.

**GENE ONTOLOGY**

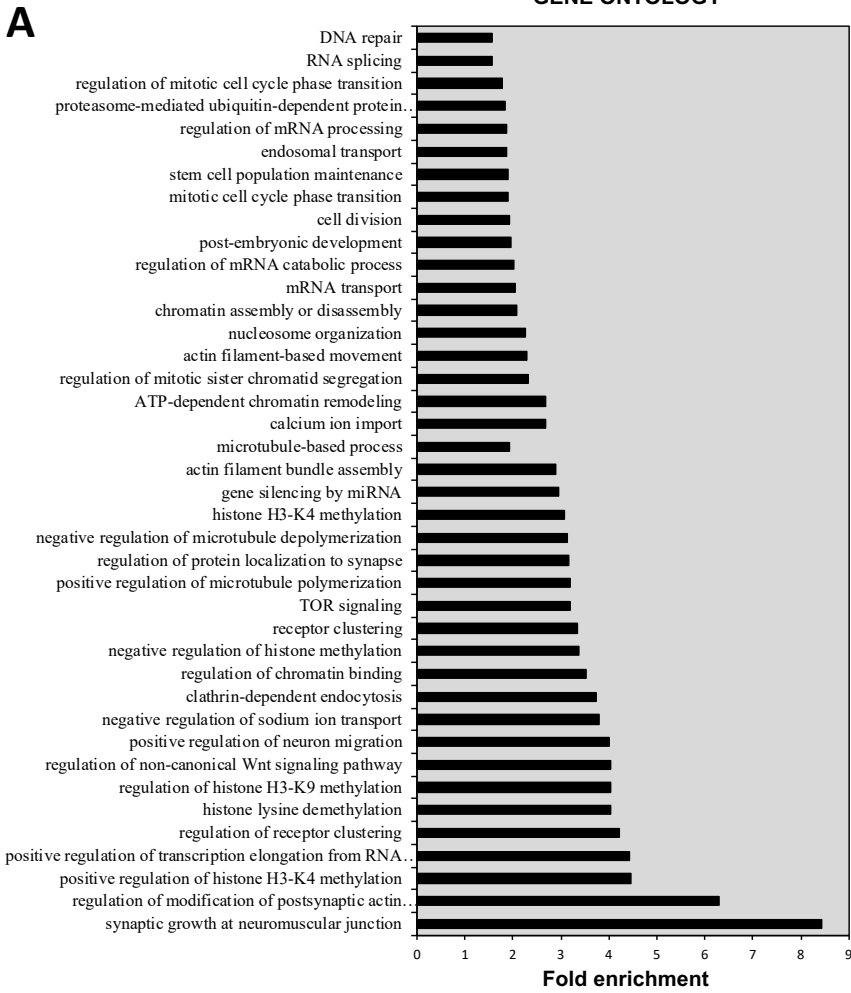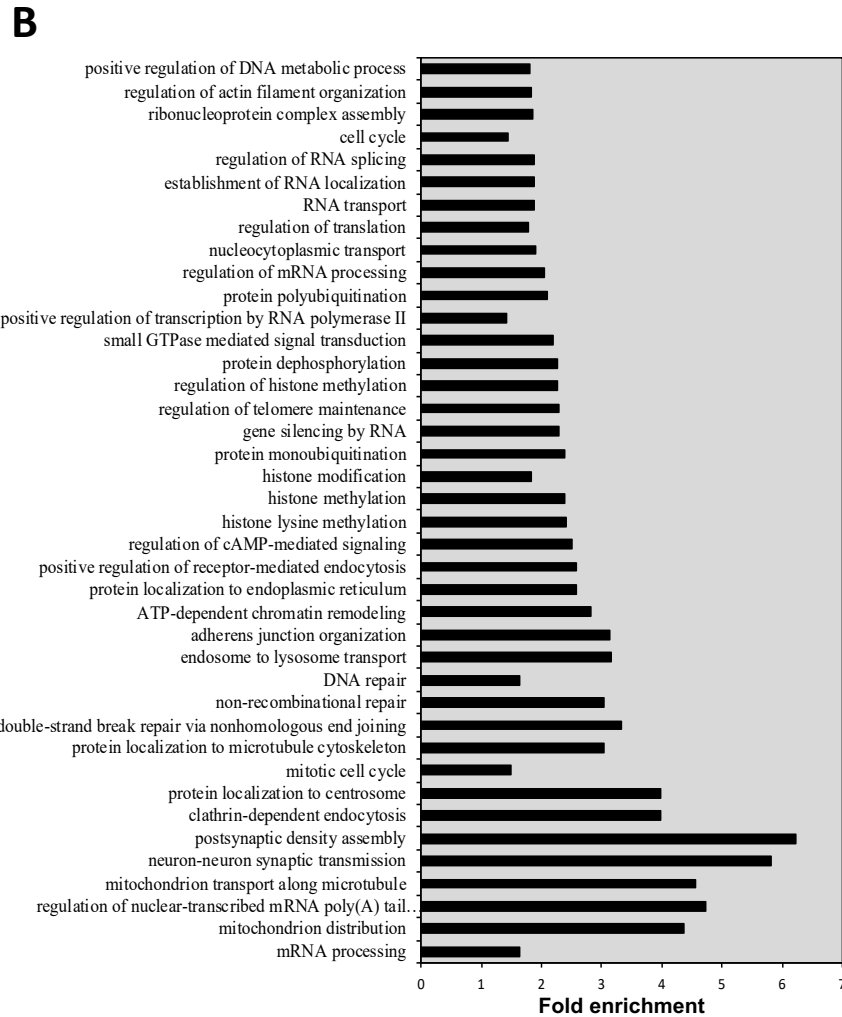

**Figure S2. Gene ontology (GO) enrichment analysis of host genes. (A)** The Top 40 GO annotations in CB1<sup>-/-</sup> SPZ up-regulated circRNAs. **(B)** The Top 40 GO annotations in CB1<sup>-/-</sup> SPZ down-regulated circRNAs.

**A****KEGG PATHWAY**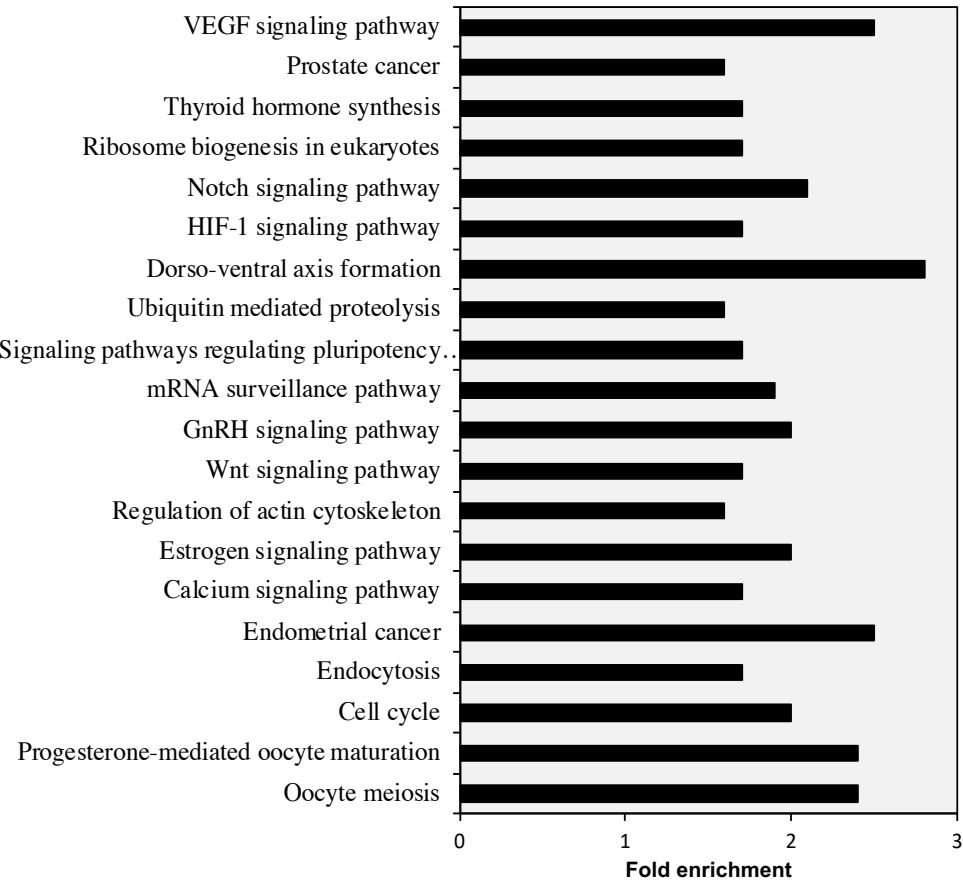**B**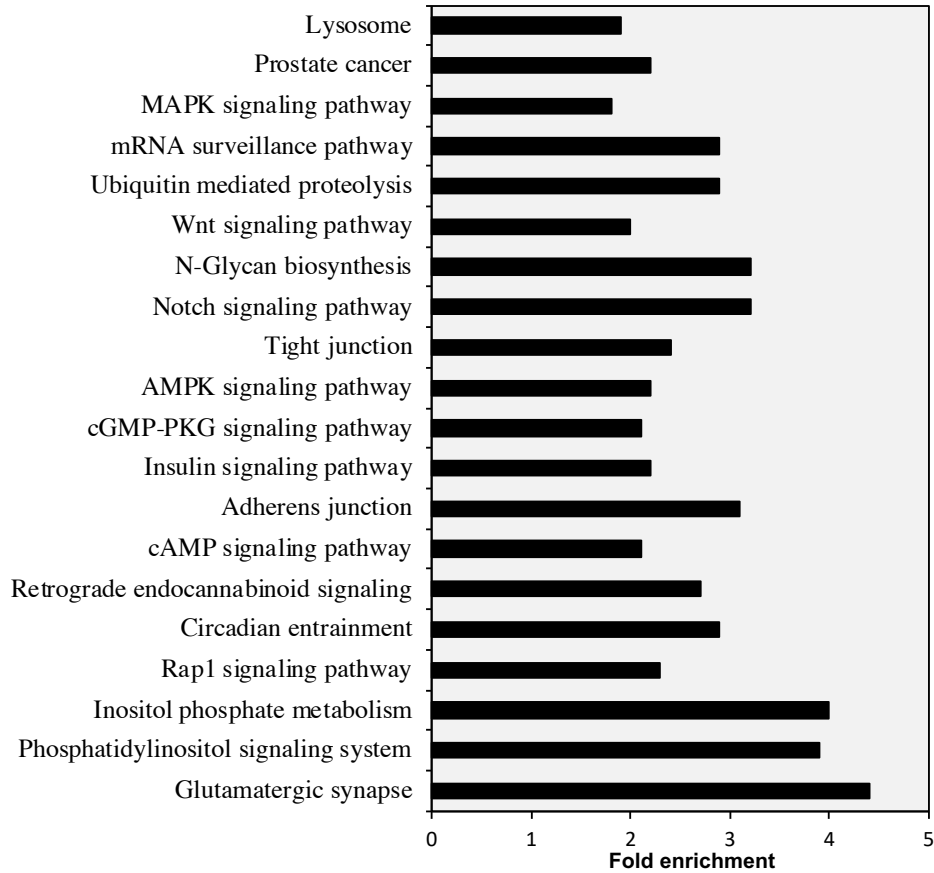

**Figure S3. Kyoto Encyclopedia of Genes and Genomes (KEGG) pathway annotation of host genes. (A)** The Top 20 KEGG signaling pathway annotations in CB1<sup>-/-</sup> SPZ up-regulated circRNAs. **(B)** The Top 20 KEGG signaling pathway annotations in CB1<sup>-/-</sup> SPZ down-regulated circRNAs.
